# Supplementary material
Source: PubMed Central journal article supplement (PMC3009871)
Supplement: supp_M110.145466_jbc.M110.145466-1.pdf [file supp_M110.145466_jbc.M110.145466-1.pdf]

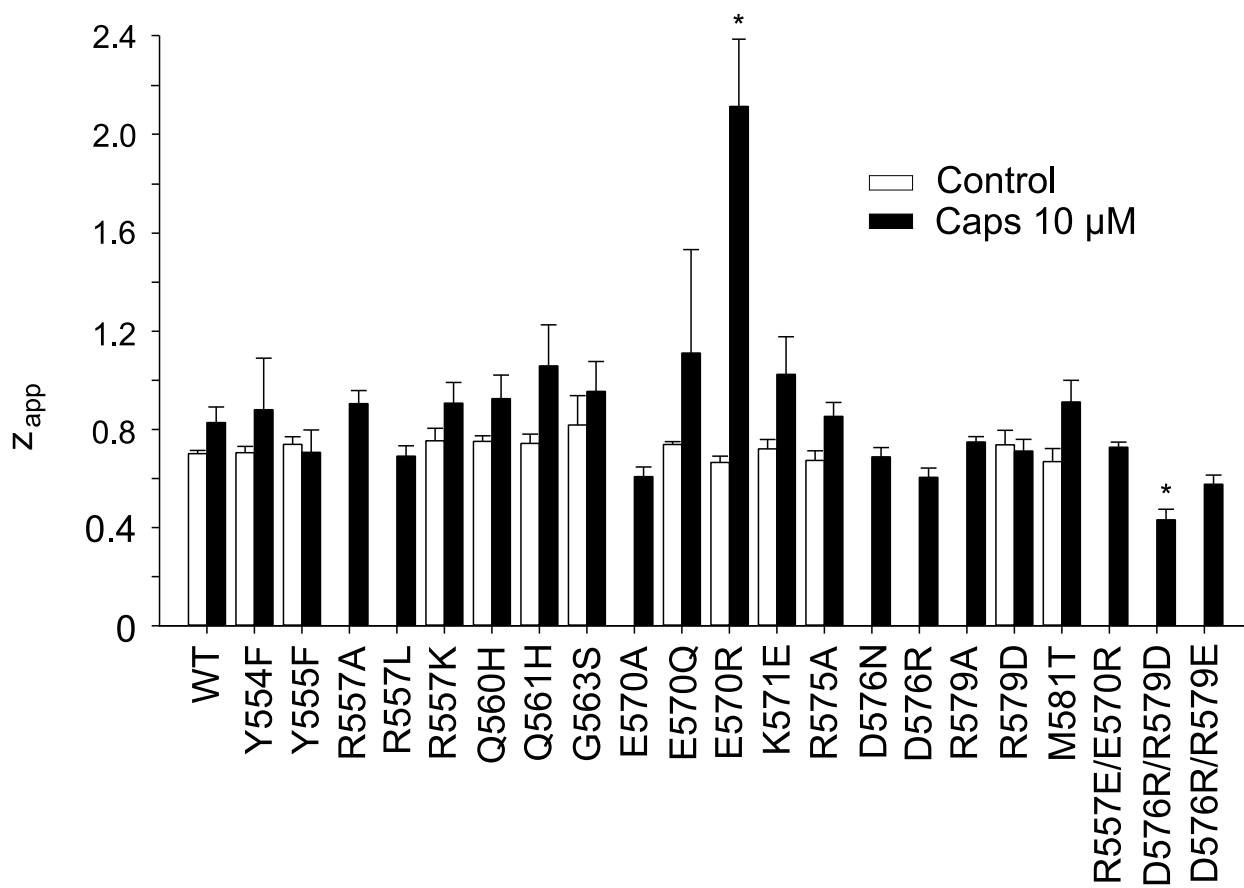

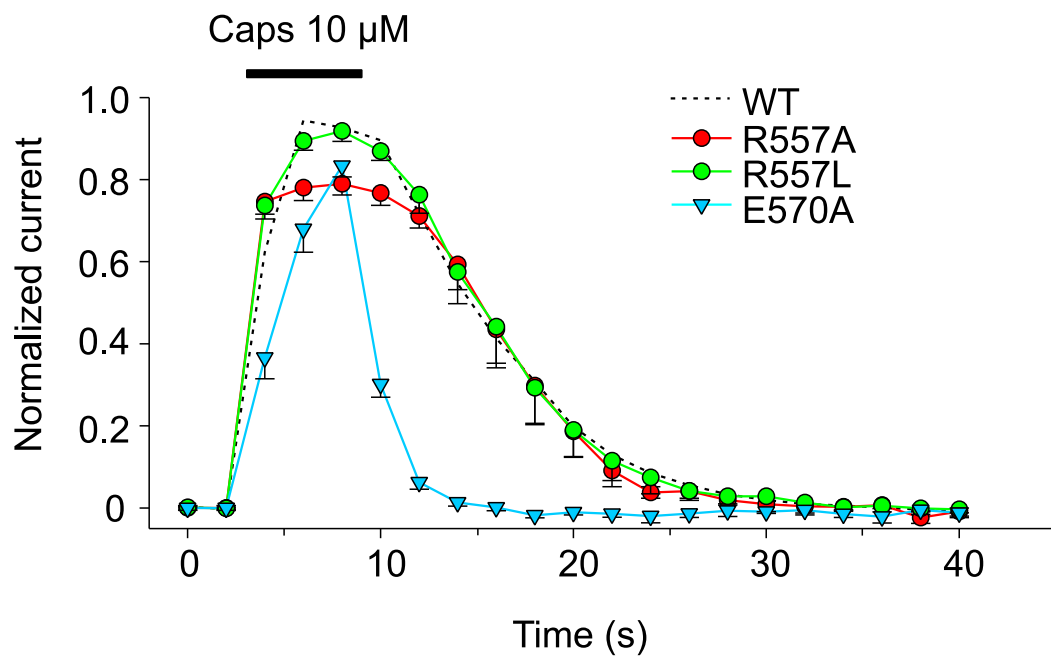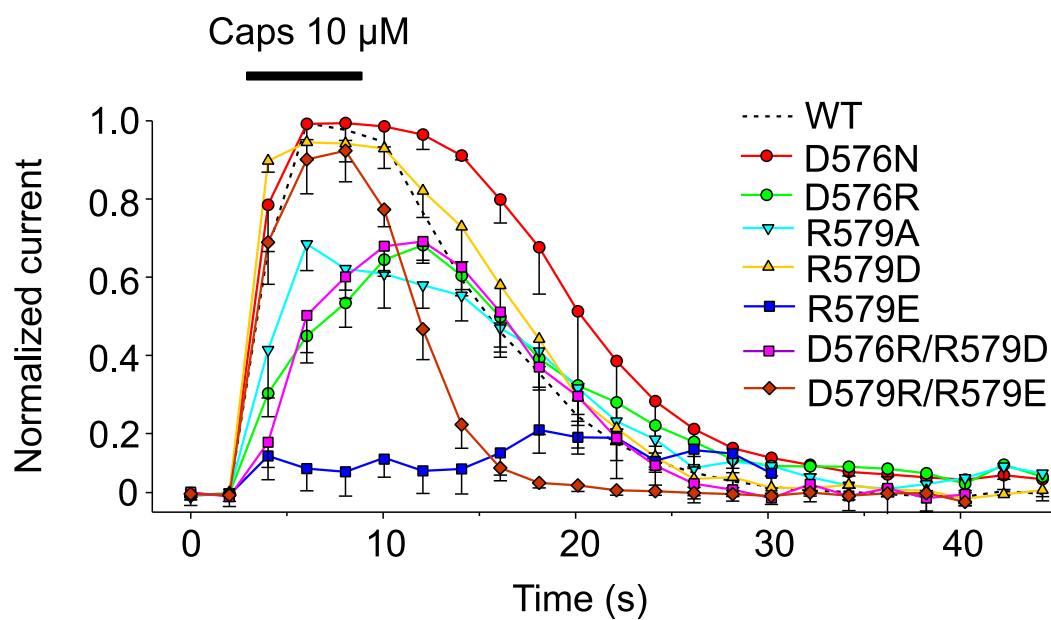

**A**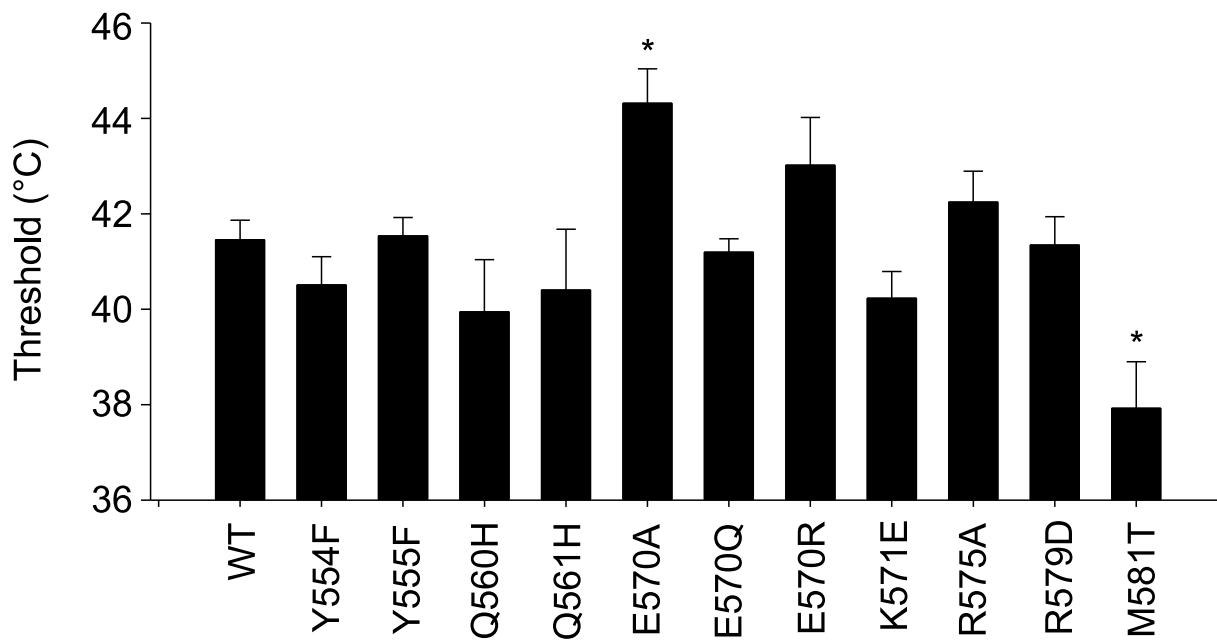**B**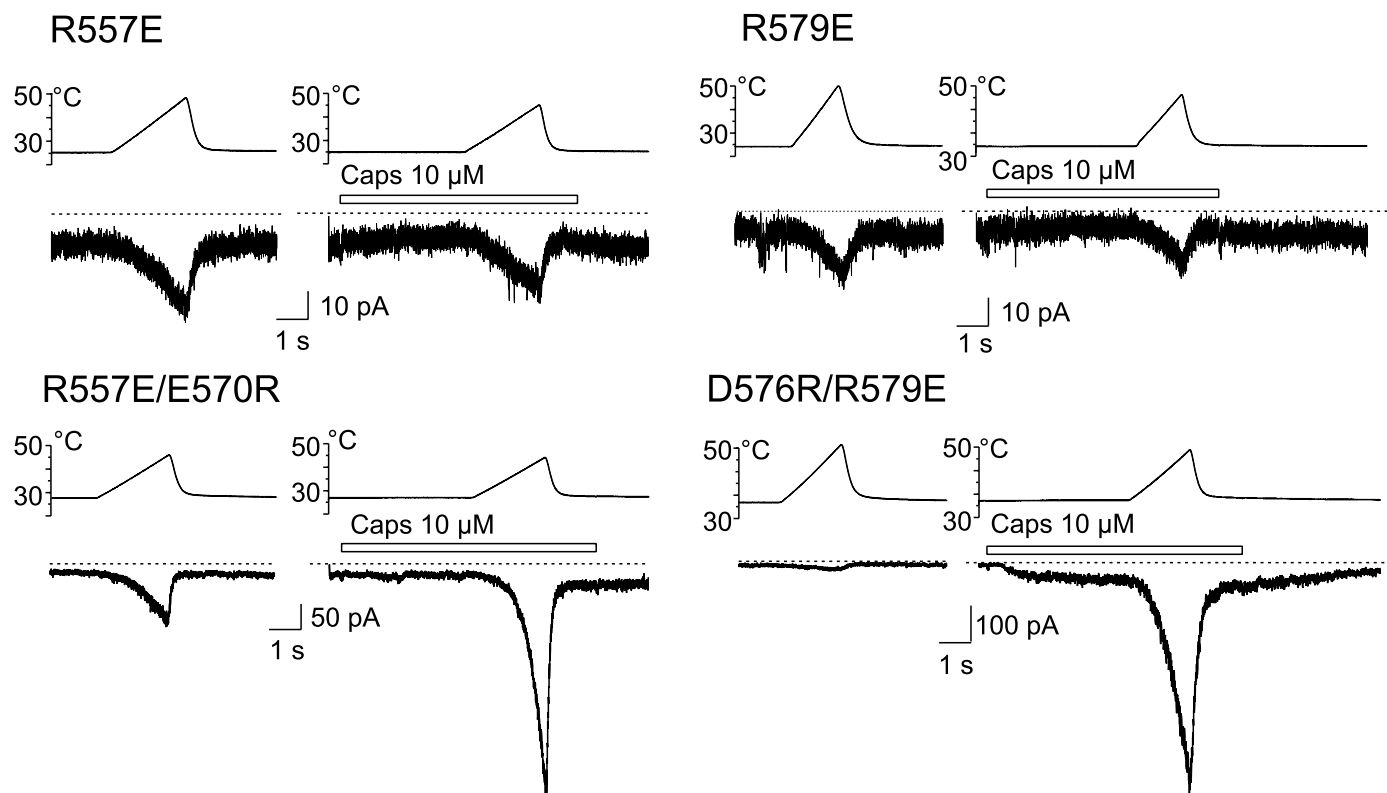

A

TRPV1-G563S

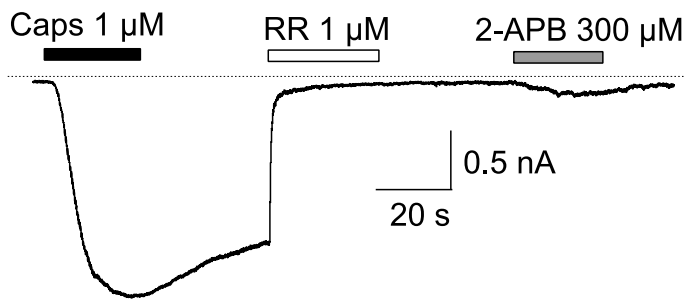

B

Control

Ruthenium red 1  $\mu$ M

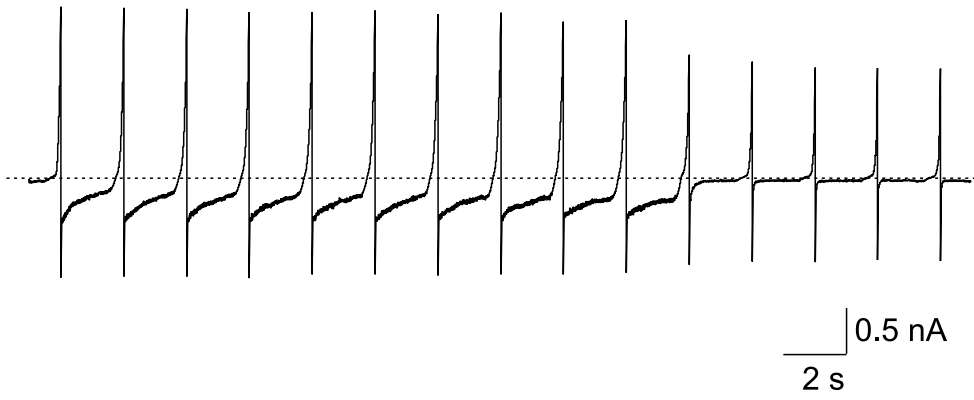

**Fig. S1.** Voltage dependence of TRPV1 mutants. Summary of the apparent number of gating charges ( $z$ ) for wild-type TRPV1 and indicated mutants in the absence (*open bars*) or presence of 10  $\mu$ M capsaicin (*filled bars*). Each bar is the mean  $\pm$  s.e.m.;  $n = 60$  for wild type and 4-17 for mutants.

**Fig. S2.** Mutations in S4 and the S4-S5 linker alter kinetics of capsaicin-induced whole cell currents. (A) Averaged whole-cell currents measured at +90 mV before, during 6-s exposure to and after washout of 10  $\mu$ M capsaicin. A voltage protocol consisted of a 500-ms ramp from  $-70$  mV to +100 mV applied every 2 s. Averaged currents were constructed from 3-5 independent recordings such as shown in Fig. 3C. The time courses of the capsaicin-induced (depolarization-modulated) whole-cell currents through E570A and (B) R576R/R579E exhibited a faster offset of capsaicin-dependent responses than in wild type TRPV1. Superimposed *dotted line* indicates the averaged currents of wild type. Note the rescue of nonfunctional R579E mutant by the charge-swapping mutation D579R/R579E.

**Fig. S3.** Mutations in S4 and S4-S5 linker altering temperature sensitivity in TRPV1. (A) Effects of mutations on the threshold for temperature activation in wild-type TRPV1 ( $n = 30$ ) and indicated mutants ( $n = 3 - 19$ ). Each bar is the mean  $\pm$  s.e.m.. (B) Representative recordings of whole-cell current responses to application of 25-48°C heat ramp (10°C/s) measured from nonfunctional R557E and R579E and the rescued double-mutants R557E/E570R and D576R/R579E in the absence or presence of 10  $\mu$ M capsaicin. Holding potential  $-70$  mV.

**Fig. S4.** TRPV1 mutation G563S stabilizes the open conformation and leads to overactive channels. (A) Whole-cell current recordings from HEK293T cell expressing TRPV1-G563S mutant. Holding potential  $-70$  mV. (B) Whole cell currents in response to a voltage protocol consisting of a 500-ms ramp from  $-70$  mV to  $+100$  mV applied every 2 s in the control extracellular solution.
